# Supplementary material for: Comparative genomics of Mycobacterium africanum Lineage 5 and Lineage 6 from Ghana suggests distinct ecological niches
Source: PubMed Central journal article supplement (PMC6062541; doi:10.1038/s41598-018-29620-2), 2018-07-26
Supplement: 41598_2018_29620_MOESM1_ESM.pdf [file 41598_2018_29620_MOESM1_ESM.pdf]

1 **Comparative genomics of *Mycobacterium africanum* Lineage 5 and Lineage 6 from**  
2 **Ghana suggests different ecological niches.**

3

4 **Authors:**

5 Isaac Darko Otchere<sup>1,2γ</sup>, Mireia Coscollá<sup>3,4γ</sup>, Leonor Sánchez-Busó<sup>5</sup>, Adwoa Asante-Poku<sup>1</sup>,  
6 Daniela Brites<sup>3,4</sup>, Chloe Loiseau<sup>3,4</sup>, Conor Meehan<sup>6</sup>, Stephen Osei-Wusu<sup>1</sup>, Audrey Forson<sup>7</sup>,  
7 Clement Laryea<sup>8</sup>, Abdallah Iddrisu Yahayah<sup>9</sup>, Akosua Baddoo<sup>7</sup>, Gloria Akosua Ansa<sup>10</sup> Samuel  
8 Yaw Aboagye<sup>1</sup>, Prince Asare<sup>1</sup>, Sonia Borrell<sup>3,4</sup>, Florian Gehre<sup>6,11</sup>, Patrick Beckert<sup>12,13</sup>, Thomas  
9 A Kohl<sup>12,13</sup>, Sanoussi N'dira<sup>14</sup>, Christian Beisel<sup>15</sup>, Martin Antonio<sup>11</sup>, Stefan Niemann<sup>12,13</sup>,  
10 Bouke C de Jong<sup>6,11</sup>, Julian Parkhill<sup>5</sup>, Simon R Harris<sup>5</sup>, Sebastien Gagneux<sup>3,4\*</sup>, Dorothy  
11 Yeboah-Manu<sup>1\*</sup>.

12

13 **Author Affiliations:**

14 <sup>1</sup>Noguchi Memorial Institute for Medical Research, University of Ghana, Legon, Accra,  
15 Ghana.

16 <sup>2</sup>Department of Biochemistry, Cell and Molecular Biology, University of Ghana, Legon,  
17 Accra, Ghana.

18 <sup>3</sup>Swiss Tropical and Public Health Institute, Basel, Switzerland.

19 <sup>4</sup>University of Basel, Basel, Switzerland.

20 <sup>5</sup>Wellcome Trust Sanger Institute, University of Cambridge, Hinxton, United Kingdom.

21 <sup>6</sup>Institute of Tropical Medicine, Antwerp, Belgium

22 <sup>7</sup>Chest Clinic, Korle-Bu Teaching Hospital, Accra, Ghana.

23 <sup>8</sup>37 Military Hospital, Accra, Ghana.

24 <sup>9</sup>Chest Department, Tamale Teaching Hospital, Tamale, Ghana.

25 <sup>10</sup>Public Health Department, University of Ghana Hospital, Legon, Accra, Ghana

26 <sup>11</sup>Medical Research Council, The Gambia Unit, Gambia

27 <sup>12</sup>Molecular and Experimental Mycobacteriology, Research Center Borstel, Borstel, Germany

28 <sup>13</sup>Germany German Center for Infection Research, Partner Site Hamburg-Borstel-Lübeck,

29 Germany

30 <sup>14</sup>National Reference Laboratory for Mycobacteria, Cotonou, Benin

31 <sup>15</sup>Department of Biosystems Science and Engineering, ETH Zurich, Basel, Switzerland.

32

33

34 \*These authors contributed equally

35 <sup>γ</sup>These authors contributed equally

36

37 Correspondence should be addressed to: DYM (dyboah-

38 Manu@noguchi.ug.edu.gh and SG (sebastien.gagneux@swisstph.ch)

39

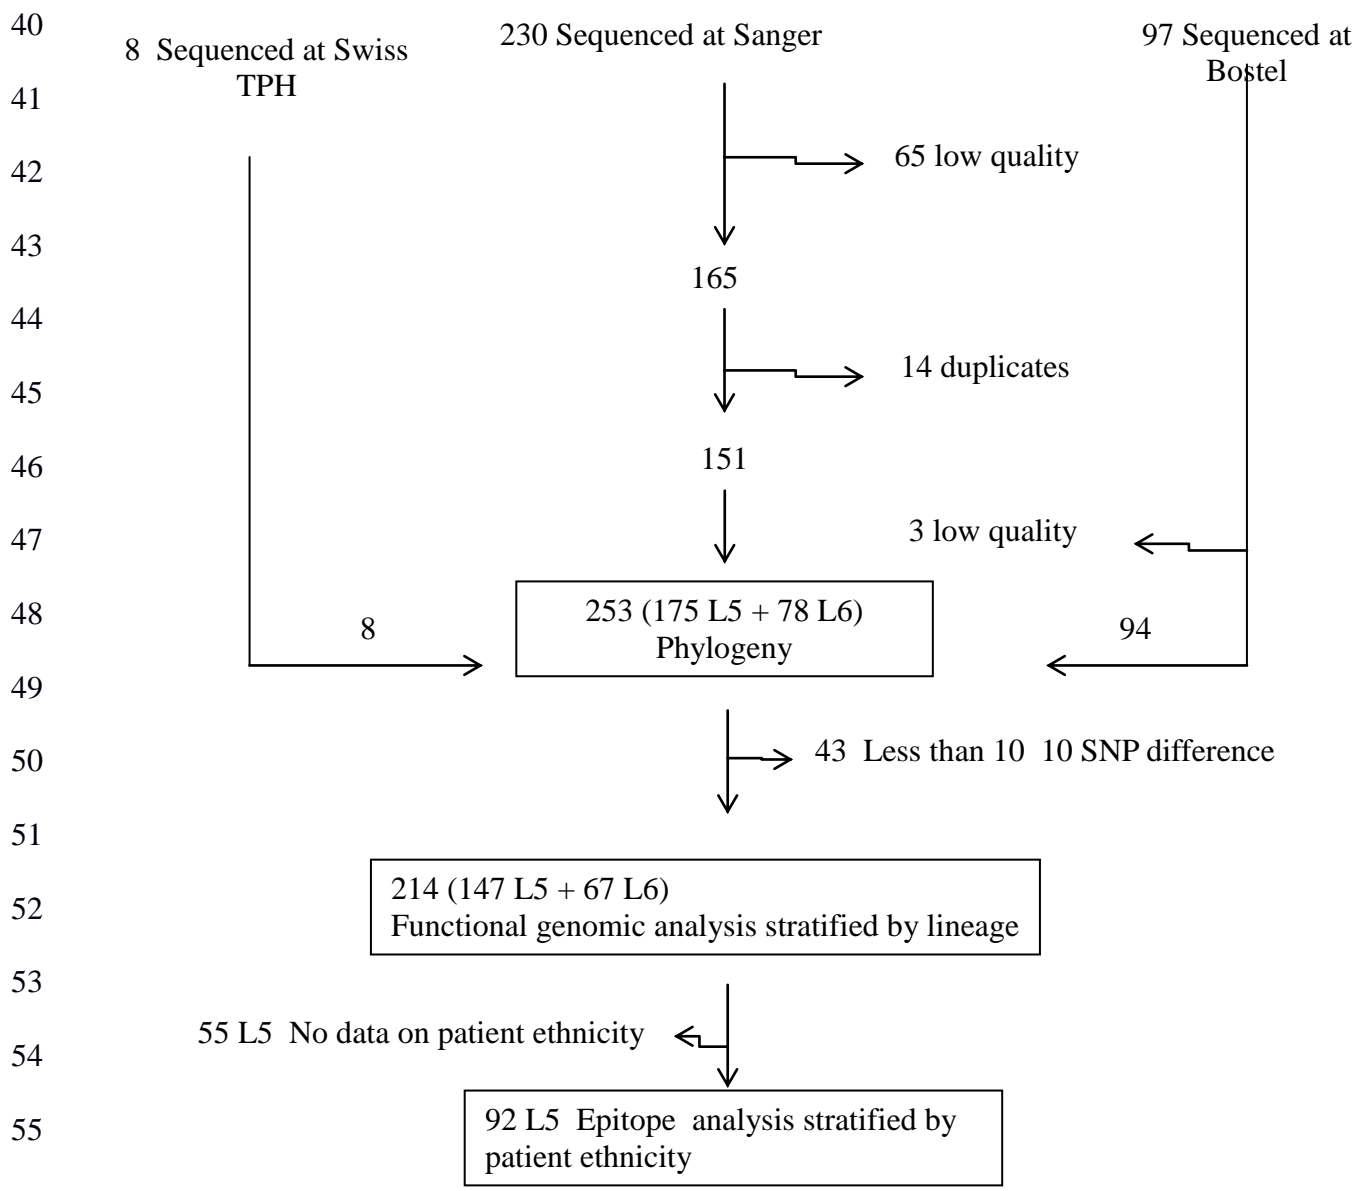

Supplementary figure S1: Flow chart of Ghanaian *Maf* genomes used for the study. Sites of DNA sequencing as well as number of genomes used for each specific analysis are indicated.

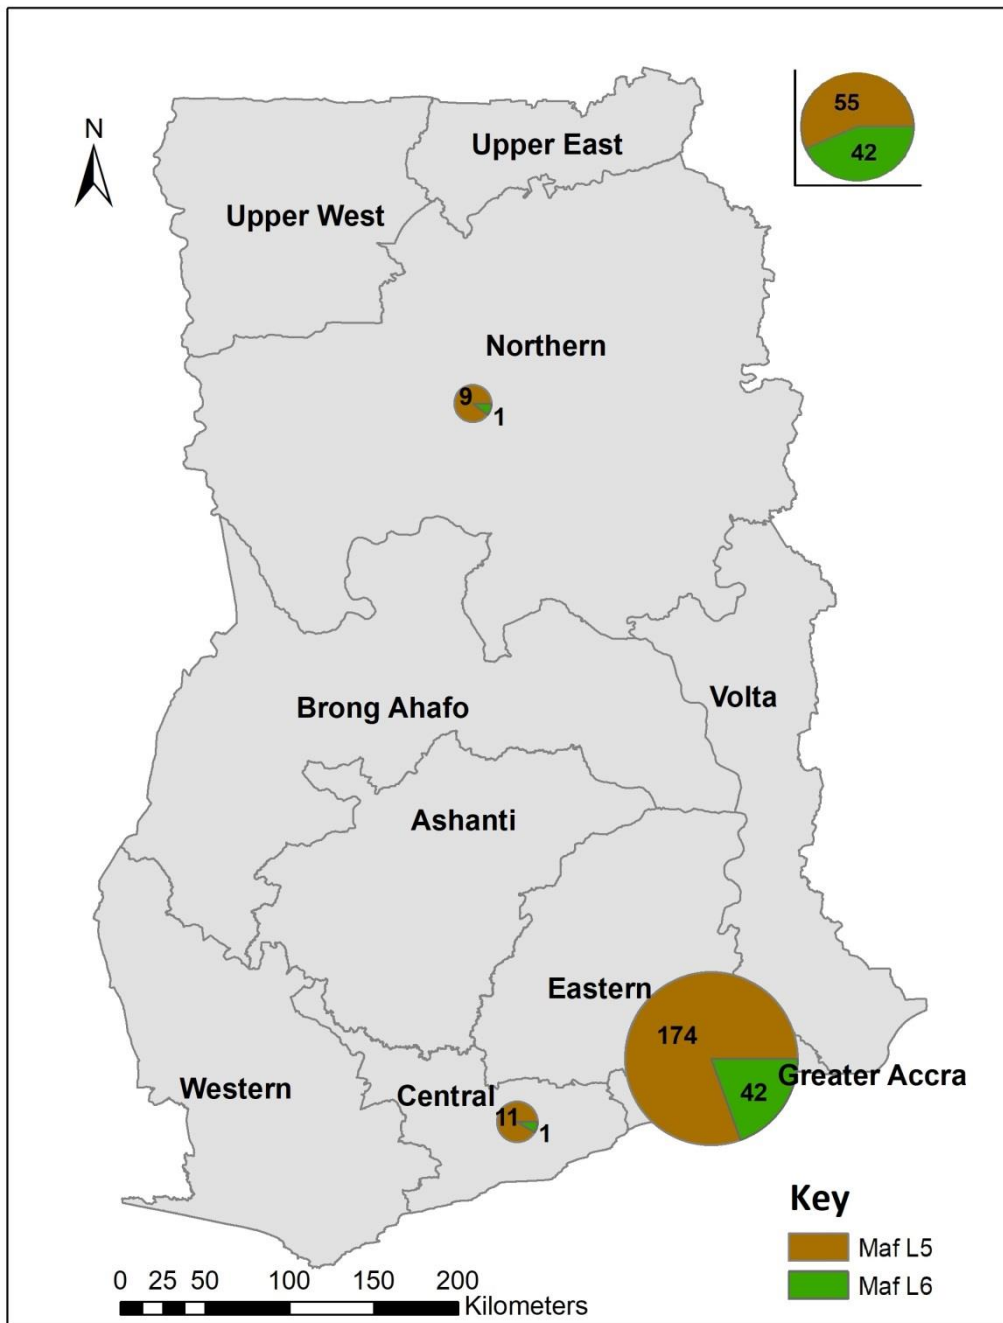

64

65 Supplementary figure S2: Map of Ghana showing the regional distribution of *Maf* isolates.

66 The sizes of pie charts correspond to number of isolates from the respective regions. the

67 map was generated with the ArcGIS ArcMap tool ESRI version 10.2.2

68 (<https://support.esri.com/en/Products/Desktop/arcgis-desktop/arcmap/10-2-2>).

69

70

71

72

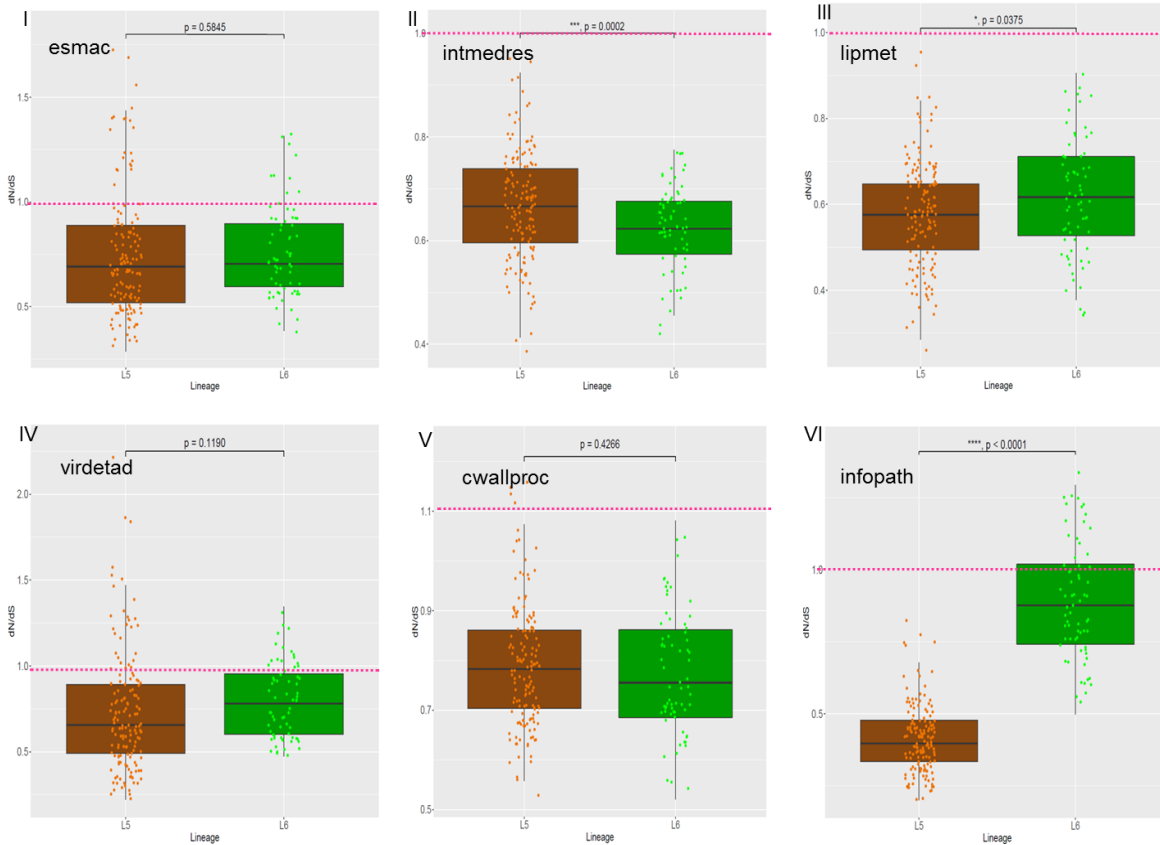

73

74 Supplementary figure S3: Pairwise dN/dS of genes of six functional categories using all  
 75 the 147 L5 against the 67 L6 genomes. *esmac* – genes essential for growth in  
 76 macrophages, *intmedres* – genes involved with intermediate metabolism and respiration,  
 77 *lipmet* – genes involved with lipid metabolism, *virdetad* – genes involved with virulence,  
 78 detoxification and adaptation, *cwallproc* - genes involved with cell wall and cell processes  
 79 and *infopath* – genes involved with information pathways

80

81

82

83

84

85

86

87

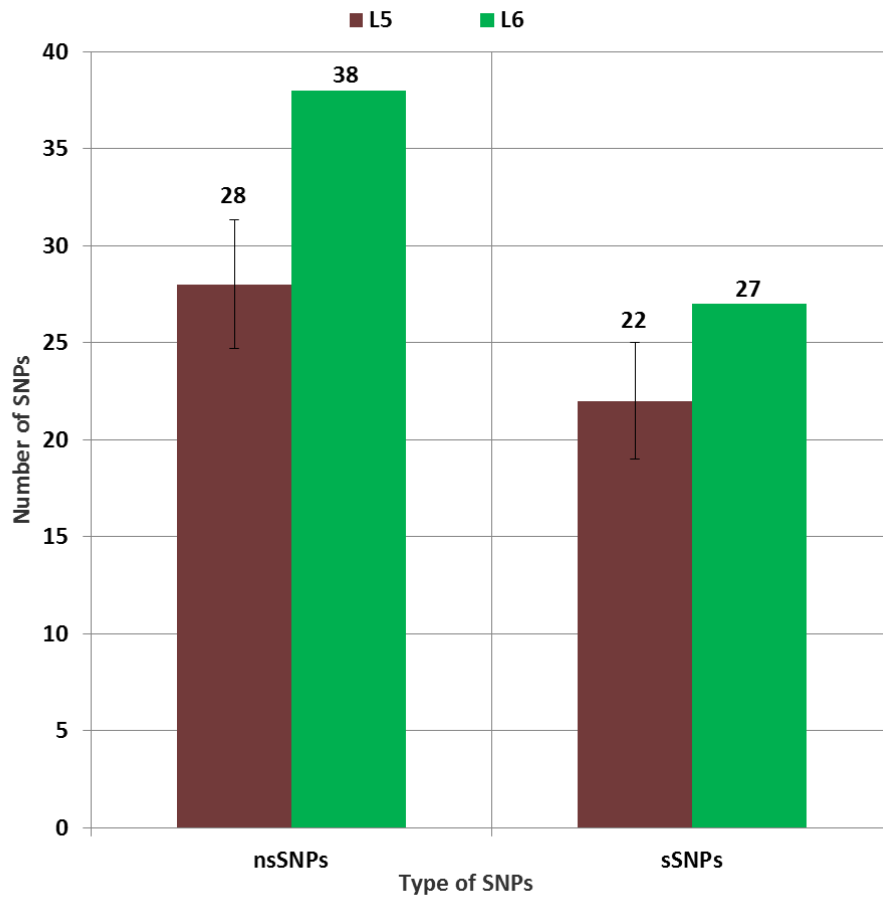

90 Supplementary figure S4: Number of non-redundant SNPs within human T cell epitopes  
91 stratified by *Maf* lineage. No difference ( $X^2 = 0.0055391$ ,  $df = 1$ ,  $p\text{-value} =$   
92  $0.9407$ ) between the proportion of nsSNPs between L6 (67 genomes) and L5 (mean  
93 values of 10 random samples of size = 67 with replacement)

102 Supplementary table S5: Mutated Human T cell antigens and epitopes of *Maf* with  
 103 mutations stratified by lineage

104

105 **Supplementary Table S5: Human T-cell antigens and epitopes with amino acid substitutions**

| Lineage | Antigen | Start  | Stop   | IEDB ID | Mutation | Gene product                                             | Function                                |
|---------|---------|--------|--------|---------|----------|----------------------------------------------------------|-----------------------------------------|
| L6      | Rv0206c | 246311 | 246337 | 144970  | L336V    | Possible conserved transmembrane transport protein MmpL3 | cell wall and cell processes            |
| L5      | Rv0222  | 266182 | 266235 | 65198   | S241C    | enoyl-CoA hydratase EchA1                                | lipid metabolism                        |
| L5      | Rv0288  | 352058 | 352111 | 3196    | M81V     | Low molecular weight protein antigen 7 EsxH              | cell wall and cell processes            |
| L6      | Rv0288  | 351860 | 351886 | 140717  | P9L      |                                                          |                                         |
| L6      | Rv0288  | 351938 | 351991 | 12402   | V34M     |                                                          |                                         |
| L5      | Rv0289  | 352389 | 352433 | 178694  | P91Q     | ESX-3 secretion-associated protein EspG3                 | cell wall and cell processes            |
| L6      | Rv0290  | 353839 | 353883 | 178433  | S266R    | ESX conserved component EccD3                            | cell wall and cell processes            |
| L6      | Rv0290  | 354148 | 354192 | 178957  | R370C    |                                                          |                                         |
| L6      | Rv0290  | 354448 | 354492 | 179031  | I456T    |                                                          |                                         |
| L5      | Rv0291  | 355809 | 355853 | 178530  | V443A    | Probable membrane-anchored mycosin MycP3                 | intermediary metabolism and respiration |
| L6      | Rv0292  | 356075 | 356119 | 178499  | A75V     | ESX conserved component EccE3                            | cell wall and cell processes            |
| L5      | Rv0294  | 358171 | 358215 | 179284  | P4S      | Probable trans-aconitate methyltransferase Tam           | intermediary metabolism and respiration |
| L6      | Rv0299  | 363515 | 363559 | 178736  | H15Y     | Hypothetical protein                                     | conserved hypotheticals                 |
| L5      | Rv0522  | 613698 | 613742 | 178563  | V231D    | GAMA-aminobutyrate permease                              | cell wall and cell processes            |
| L5      | Rv0529  | 620575 | 620619 | 178614  | P238S    | Possible cytochrome C-type biogenesis protein CcsA       | intermediary metabolism and respiration |
| L6      | Rv0853c | 950450 | 950494 | 179057  | Q219R    | Probable pyruvate or indole-3-pyruvate decarboxylase     | intermediary metabolism and respiration |

|    |         |         |         |        |       | Pdc                                               |                                         |
|----|---------|---------|---------|--------|-------|---------------------------------------------------|-----------------------------------------|
| L5 | Rv0934  | 1043162 | 1043218 | 9923   | P356L | Periplasmic phosphate-binding lipoprotein PstS1   | cell wall and cell processes            |
| L6 | Rv0934  | 1042550 | 1042609 | 44020  | A152D |                                                   |                                         |
| L6 | Rv0934  | 1043027 | 1043086 | 3505   | P310L |                                                   |                                         |
| L6 | Rv0993  | 1109464 | 1109508 | 178909 | V70A  | UTP--glucose-1-phosphate uridylyltransferase GalU | intermediary metabolism and respiration |
| L5 | Rv1028c | 1150364 | 1150408 | 178770 | F432L | Probable sensor protein KdpD                      | regulatory proteins                     |
| L6 | Rv1045  | 1167928 | 1167972 | 179449 | H93Y  | Hypothetical protein                              | conserved hypotheticals                 |
| L5 | Rv1174c | 1305732 | 1305758 | 226572 | A84T  | Low molecular weight T-cell antigen TB8.4         | cell wall and cell processes            |
| L5 | Rv1242  | 1384673 | 1384723 | 16879  | S53R  | Possible toxin VapC33                             | virulence, detoxification, adaptation   |
| L5 | Rv1255c | 1402877 | 1402936 | 55530  | R152H | Probable transcriptional regulatory protein       | regulatory proteins                     |
| L5 | Rv1503c | 1694383 | 1694427 | 178753 | E54Q  | Conserved hypothetical protein                    | conserved hypotheticals                 |
| L6 | Rv1617  | 1816669 | 1816695 | 144897 | G161E | Probable pyruvate kinase PykA                     | intermediary metabolism and respiration |
| L5 | Rv1866  | 2113587 | 2113658 | 120392 | C168S | Conserved protein                                 | lipid metabolism                        |
| L5 | Rv1871c | 2121642 | 2121686 | 178713 | R81L  | Conserved protein                                 | conserved hypotheticals                 |
| L5 | Rv1885c | 2134792 | 2134836 | 178607 | G27S  | Chorismate mutase                                 | intermediary metabolism and respiration |
| L5 | Rv1886c | 2134893 | 2134952 | 76455  | Y306C | Secreted antigen 85-B FbpB (85B)                  | lipid metabolism                        |
| L5 | Rv1886c | 2135748 | 2135867 | 181733 | G18R  |                                                   |                                         |
| L6 | Rv1908c | 2155107 | 2155151 | 125317 | W328L | Catalase-peroxidase-peroxynitritase T KatG        | virulence, detoxification, adaptation   |
| L6 | Rv1985c | 2229108 | 2229182 | 179874 | R256P | Probable transcriptional regulatory protein       | regulatory proteins                     |
| L6 | Rv1985c | 2229333 | 2229407 | 179851 | A188V |                                                   |                                         |
| L5 | Rv1987  | 2231035 | 2231103 | 38245  | T13P  | Possible chitinase                                | cell wall and cell processes            |
| L5 | Rv2029c | 2275495 | 2275554 | 154044 | L297R | 6-phosphofructokin                                | intermediary metabolism and             |



|    |         |         |         |        |             |                                                                      |                                                |
|----|---------|---------|---------|--------|-------------|----------------------------------------------------------------------|------------------------------------------------|
|    |         |         |         |        |             | ase PfkB                                                             | respiration                                    |
| L5 | Rv2029c | 2276215 | 2276274 | 154733 | H59Y        |                                                                      |                                                |
| L6 | Rv2029c | 2276185 | 2276244 | 155082 | S77I        |                                                                      |                                                |
| L6 | Rv2094c | 2353076 | 2353120 | 179580 | P61L        | Sec-independent protein translocase membrane-bound protein TatA      | cell wall and cell processes                   |
| L5 | Rv2576c | 2900406 | 2900450 | 178470 | H91P        | Possible conserved membrane protein                                  | cell wall and cell processes                   |
| L5 | Rv2627c | 2954170 | 2954196 | 144882 | R188G       | Conserved protein                                                    | conserved hypotheticals                        |
| L6 | Rv2627c | 2954314 | 2954358 | 179452 | T144M       |                                                                      |                                                |
| L5 | Rv2628  | 2955058 | 2955102 | 106659 | R5Q & P6L   | Hypothetical protein                                                 | conserved hypotheticals                        |
| L5 | Rv2628  | 2955073 | 2955117 | 106713 | P6L         |                                                                      |                                                |
| L5 | Rv2628  | 2955133 | 2955177 | 106537 | A35V        |                                                                      |                                                |
| L5 | Rv2628  | 2955358 | 2955402 | 106364 | P103S       |                                                                      |                                                |
| L5 | Rv2819c | 3126972 | 3127016 | 179215 | E122A       | Hypothetical protein                                                 | conserved hypotheticals                        |
| L6 | Rv2855  | 3166042 | 3166086 | 179616 | D290Y       | NADPH-dependent mycothiol reductase Mtr                              | intermediary metabolism and respiration        |
| L6 | Rv2865  | 3177684 | 3177728 | 178778 | P58T        | Antitoxin RelF                                                       | virulence, detoxification, adaptation          |
| L6 | Rv2873  | 3184490 | 3184564 | 153271 | V197A       | Cell surface lipoprotein Mpt83                                       | cell wall and cell processes                   |
| L6 | Rv2874  | 3185195 | 3185239 | 179117 | I130T       | Possible integral membrane C-type cytochrome biogenesis protein DipZ | intermediary metabolism and respiration        |
| L6 | Rv2874  | 3186116 | 3186160 | 179424 | S436P       |                                                                      |                                                |
| L5 | Rv2875  | 3187075 | 3187149 | 20744  | D32G        | Major secreted immunogenic protein Mpt70                             | cell wall and cell processes                   |
| L5 | Rv2958c | 3311113 | 3311139 | 189566 | L292S       | Possible glycosyl transferase                                        | intermediary metabolism and respiration        |
| L6 | Rv2994  | 3351437 | 3351508 | 120878 | M65I & G76S | Probable conserved integral membrane protein                         | cell wall and cell processes                   |
| L5 | Rv3003c | 3362435 | 3362479 | 178644 | A183G       | Acetolactate synthase (large subunit)                                | Involved in valine and isoleucine biosynthesis |

|    |         |         |         |        |        |                                                                            |                                         |
|----|---------|---------|---------|--------|--------|----------------------------------------------------------------------------|-----------------------------------------|
| L6 | Rv3003c | 3362435 | 3362479 | 178644 | A177V  |                                                                            |                                         |
| L5 | Rv3010c | 3368919 | 3368963 | 178438 | Y304H  | Probable 6-phosphofructokinase PfkA                                        | intermediary metabolism and respiration |
| L6 | Rv3020c | 3379141 | 3379185 | 178429 | A56V   | ESAT-6 like protein EsxS                                                   | cell wall and cell processes            |
| L5 | Rv3024c | 3383625 | 3383669 | 178477 | D80A   | Probable tRNA (5-methylaminomethyl-2-thiouridylate)-methyltransferase TrmU | information pathways                    |
| L6 | Rv3024c | 3382941 | 3382985 | 178496 | E305G  |                                                                            |                                         |
| L5 | Rv3296  | 3676775 | 3676870 | 142233 | A32G   | Probable ATP-dependent helicase Lhr                                        | information pathways                    |
| L5 | Rv3333c | 3720465 | 3720509 | 70013  | T103A  | Hypothetical proline rich protein                                          | conserved hypotheticals                 |
| L5 | Rv3617  | 4057808 | 4057852 | 178550 | L31R   | Probable epoxide hydrolase EphA                                            | virulence, detoxification, adaptation   |
| L5 | Rv3634c | 4073108 | 4073152 | 178744 | T159I  | UDP-glucose 4-epimerase GalE1                                              | intermediary metabolism and respiration |
| L5 | Rv3763  | 4209047 | 4209106 | 105967 | S20P   | 19 kDa lipoprotein antigen precursor LpqH                                  | cell wall and cell processes            |
| L6 | Rv3763  | 4209107 | 4209166 | 18914  | T40A   |                                                                            |                                         |
| L5 | Rv3775  | 4220216 | 4220260 | 179234 | W192S  | Probable lipase LipE                                                       | intermediary metabolism and respiration |
| L5 | Rv3804c | 4265810 | 4265869 | 21482  | N266D  | Secreted antigen 85-a FbpA                                                 | lipid metabolism                        |
| L6 | Rv3804c | 4266161 | 4266229 | 195727 | T145A  |                                                                            |                                         |
| L5 | Rv3823c | 4288659 | 4288703 | 178473 | N946H  | Conserved integral membrane transport protein MmpL8                        | cell wall and cell processes            |
| L5 | Rv3823c | 4291281 | 4291307 | 144909 | P81S   |                                                                            |                                         |
| L6 | Rv3823c | 4290132 | 4290176 | 179015 | P454A  |                                                                            |                                         |
| L5 | Rv3825c | 4298772 | 4298816 | 178609 | G278D  | Polyketide synthase Pks2                                                   | lipid metabolism                        |
| L6 | Rv3825c | 4298772 | 4298816 | 178609 | D277N  |                                                                            |                                         |
| L5 | Rv3859c | 4332530 | 4332574 | 178759 | A1177G | Probable ferredoxin-dependent glutamate synthase                           | intermediary metabolism and respiration |
| L6 | Rv3874  | 4352304 | 4352363 | 34928  | Q28P   | 10 kDa culture filtrate antigen                                            | cell wall and cell processes            |

|    |         |         |         |        |               |                                         |                                         |
|----|---------|---------|---------|--------|---------------|-----------------------------------------|-----------------------------------------|
|    |         |         |         |        |               | EsxB (LHP)<br>(CFP10)                   |                                         |
| L6 | Rv3878  | 4357236 | 4357295 | 20015  | G185A         | ESX-1 secretion-associated protein EspJ | cell wall and cell processes            |
| L5 | Rv3879c | 4357713 | 4357760 | 144864 | A685T & A684D | ESX-1 secretion-associated protein EspK | cell wall and cell processes            |
| L6 | Rv3879c | 4359339 | 4359377 | 120976 | T143S         |                                         |                                         |
| L5 | Rv3883c | 4364689 | 4364757 | 144921 | A12V          | Membrane-anchored mycosin MycP1         | intermediary metabolism and respiration |
| L6 | Rv3883c | 4363603 | 4363641 | 120428 | L375P         |                                         |                                         |

106

107

108

109

110

111

112

113

114

115

116

117

118

119

120

121

122

123

124

125

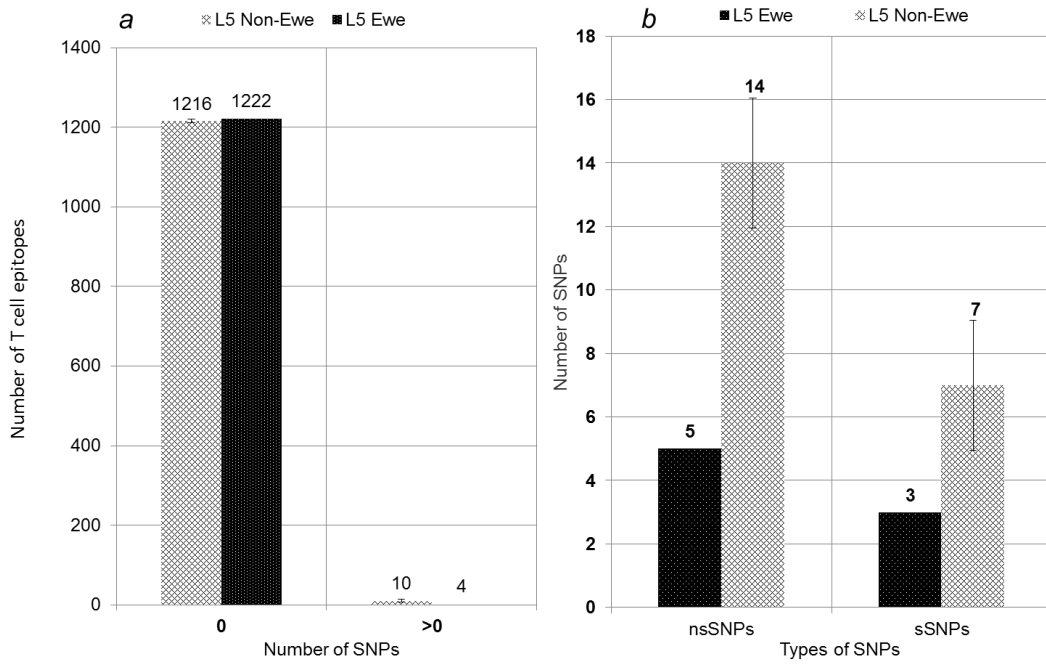

127

128 Supplementary figure S6: Number of epitopes with and without nsSNPs stratified by Lineage 5  
 129 with patient ethnicity (a). Number of non-redundant SNPs in epitopes stratified by ethnicity of L5  
 130 infected patients (b). (The values for the non-Ewe associated L5 are mean estimates of 10 random  
 131 samples of size 15 with replacement)

132

133

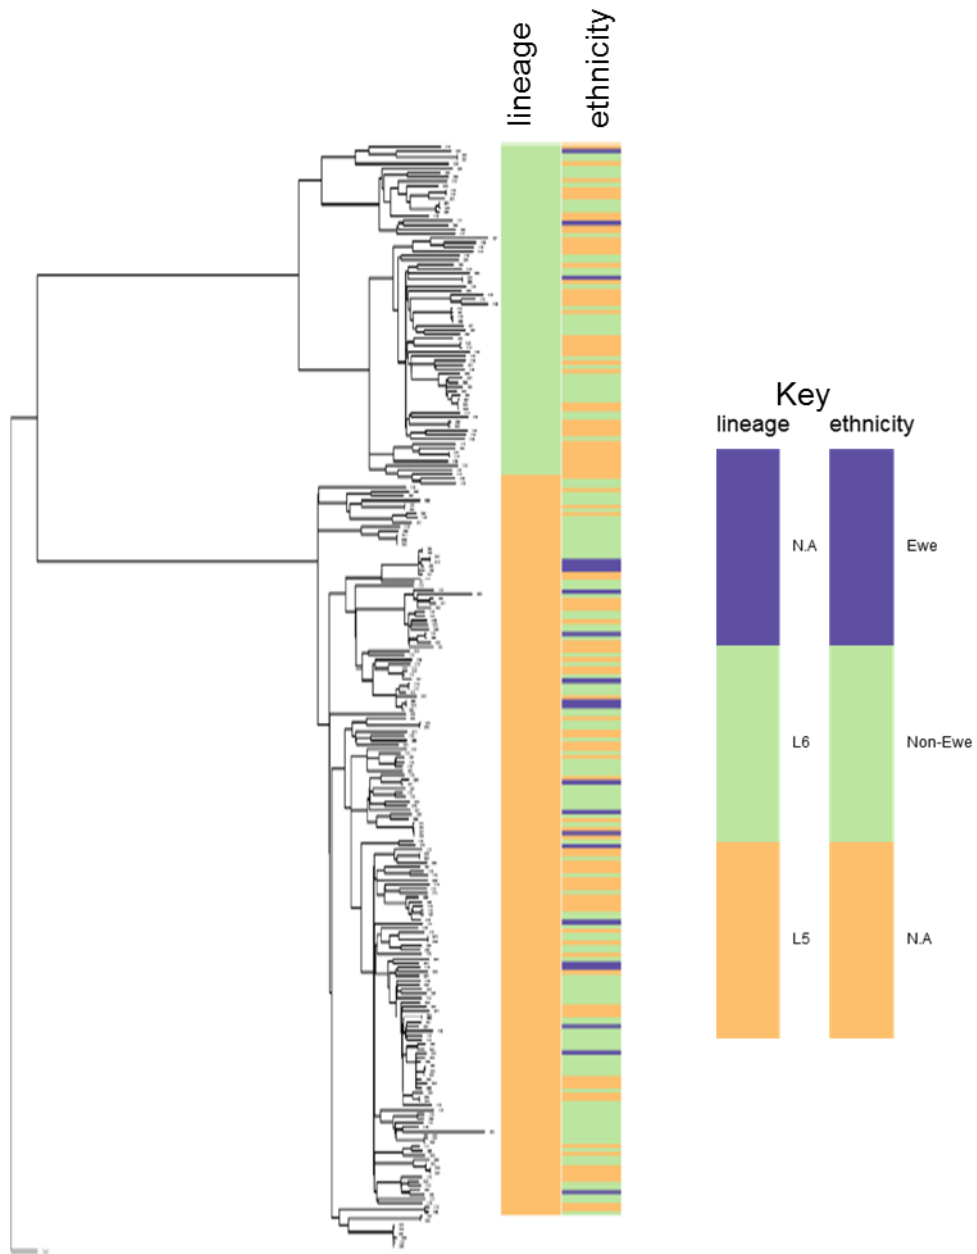

134

135 Supplementary figure S7: Uniform distribution of L5 isolated from ethnic Ewe TB patients among  
 136 the L5 clade.

137

138

139

140

141

142

144 Supplementary data S8: Genomes and accession numbers of *Maf* from Ghana.

| Genome Number | Isolate Name | Sequencing Name | Isolation Institute | Sequencing Institute | Provider | Accession Number | Country of Origin |
|---------------|--------------|-----------------|---------------------|----------------------|----------|------------------|-------------------|
| G00568        | N1194        | N1194           | NMIMR               | STPH                 | SG       | ERR841438        | Ghana             |
| G00572        | N1201        | N1201           | NMIMR               | STPH                 | SG       | ERR841440        | Ghana             |
| G00573        | N1202        | N1202           | NMIMR               | STPH                 | SG       | ERR841441        | Ghana             |
| G00731        | N1203        | N1203           | NMIMR               | STPH                 | SG       | ERR2181457       | Ghana             |
| G00895        | N1172        | DY20            | NMIMR               | STPH                 | SG       | ERR234202        | Ghana             |
| G00896        | N1179        | DY21            | NMIMR               | STPH                 | SG       | ERR234113        | Ghana             |
| G00898        | N1186        | DY26            | NMIMR               | STPH                 | SG       | ERR234204        | Ghana             |
| G00962        | TBNM0176     | N1200           | NMIMR               | ETH                  | SG       | ERR2181458       | Ghana             |
| G03829        | TBNM2359A    | SNOG240         | NMIMR               | WTSI                 | DYM      | ERR1334053       | Ghana             |
| G03830        | TBNM3650     | SNOG239         | NMIMR               | WTSI                 | DYM      | ERR1334052       | Ghana             |
| G04127        | TBNM2351     | SNOG236         | NMIMR               | WTSI                 | DYM      | ERR1334051       | Ghana             |
| G04128        | TBNM2111     | SNOG234         | NMIMR               | WTSI                 | DYM      | ERR1334050       | Ghana             |
| G04129        | TBNM3612     | SNOG226         | NMIMR               | WTSI                 | DYM      | ERR1334049       | Ghana             |
| G04130        | TBNM2240B    | SNOG224         | NMIMR               | WTSI                 | DYM      | ERR1215483       | Ghana             |
| G04131        | TBNM2036     | SNOG223         | NMIMR               | WTSI                 | DYM      | ERR1215482       | Ghana             |
| G04132        | TBNM2096     | SNOG222         | NMIMR               | WTSI                 | DYM      | ERR1215481       | Ghana             |
| G04133        | TBNM1510     | SNOG221         | NMIMR               | WTSI                 | DYM      | ERR1215480       | Ghana             |
| G04134        | TBNM2273     | SNOG218         | NMIMR               | WTSI                 | DYM      | ERR1215479       | Ghana             |
| G04163        | TBNM1821B    | SNOG217         | NMIMR               | WTSI                 | DYM      | ERR1215478       | Ghana             |
| G04164        | TBNM1642     | SNOG214         | NMIMR               | WTSI                 | DYM      | ERR1215477       | Ghana             |
| G04165        | TBNM2263     | SNOG213         | NMIMR               | WTSI                 | DYM      | ERR1215476       | Ghana             |
| G04166        | TBNM1203     | SNOG212         | NMIMR               | WTSI                 | DYM      | ERR1215475       | Ghana             |
| G08466        | TBNM1347     | SNOG170         | NMIMR               | WTSI                 | DYM      | ERR1082113       | Ghana             |
| G08467        | TBNM1108     | SNOG171         | NMIMR               | WTSI                 | DYM      | ERR1082114       | Ghana             |
| G08468        | TBNM2708     | SNOG172         | NMIMR               | WTSI                 | DYM      | ERR1082115       | Ghana             |
| G08469        | TBNM2287     | SNOG173         | NMIMR               | WTSI                 | DYM      | ERR1082116       | Ghana             |
| G08470        | TBNM2663     | SNOG174         | NMIMR               | WTSI                 | DYM      | ERR1082117       | Ghana             |
| G08471        | TBNM2919     | SNOG176         | NMIMR               | WTSI                 | DYM      | ERR1082119       | Ghana             |
| G08472        | TBNM2660     | SNOG177         | NMIMR               | WTSI                 | DYM      | ERR1082120       | Ghana             |
| G08473        | TBNM3342     | SNOG179         | NMIMR               | WTSI                 | DYM      | ERR1082122       | Ghana             |
| G08474        | TBNM3323     | SNOG180         | NMIMR               | WTSI                 | DYM      | ERR1082123       | Ghana             |
| G08475        | TBNM2910     | SNOG181         | NMIMR               | WTSI                 | DYM      | ERR1082124       | Ghana             |
| G08476        | TBNM1962     | SNOG182         | NMIMR               | WTSI                 | DYM      | ERR1082125       | Ghana             |
| G08477        | TBNM3285     | SNOG185         | NMIMR               | WTSI                 | DYM      | ERR1082126       | Ghana             |
| G08478        | TBNM1571     | SNOG190         | NMIMR               | WTSI                 | DYM      | ERR1082127       | Ghana             |
| G08479        | TBNM1672     | SNOG191         | NMIMR               | WTSI                 | DYM      | ERR1082128       | Ghana             |
| G08480        | TBNM1135     | SNOG192         | NMIMR               | WTSI                 | DYM      | ERR1082129       | Ghana             |
| G08481        | TBNM1821     | SNOG193         | NMIMR               | WTSI                 | DYM      | ERR1082130       | Ghana             |
| G08482        | TBNM2541     | SNOG201         | NMIMR               | WTSI                 | DYM      | ERR1082131       | Ghana             |
| G08483        | TBNM1225     | SNOG202         | NMIMR               | WTSI                 | DYM      | ERR1082132       | Ghana             |

|        |           |         |       |      |     |                         |       |
|--------|-----------|---------|-------|------|-----|-------------------------|-------|
| G08484 | TBNM1793  | SNOG203 | NMIMR | WTSI | DYM | ERR1082133              | Ghana |
| G08485 | TBNM2199  | SNOG204 | NMIMR | WTSI | DYM | ERR1082134              | Ghana |
| G08486 | TBNM2238B | SNOG205 | NMIMR | WTSI | DYM | ERR1082135              | Ghana |
| G08487 | TBNM1582  | SNOG207 | NMIMR | WTSI | DYM | ERR1082136              | Ghana |
| G08488 | TBNM2026  | SNOG208 | NMIMR | WTSI | DYM | ERR1082137              | Ghana |
| G08489 | TBNM1529  | SNOG209 | NMIMR | WTSI | DYM | ERR1082138              | Ghana |
| G08490 | TBNM2384  | SNOG211 | NMIMR | WTSI | DYM | ERR1082139              | Ghana |
| G08491 | TBNM1573  | SNOG215 | NMIMR | WTSI | DYM | ERR1082140              | Ghana |
| G08492 | TBNM1280  | SNOG216 | NMIMR | WTSI | DYM | ERR1082141              | Ghana |
| G08493 | TBNM2464  | SNOG219 | NMIMR | WTSI | DYM | ERR1082142              | Ghana |
| G08494 | TBNM2604  | SNOG220 | NMIMR | WTSI | DYM | ERR1082143              | Ghana |
| G08495 | TBNM3359C | SNOG227 | NMIMR | WTSI | DYM | ERR1203053              | Ghana |
| G08496 | TBNM3577  | SNOG228 | NMIMR | WTSI | DYM | ERR1203054              | Ghana |
| G08497 | TBNM2359B | SNOG229 | NMIMR | WTSI | DYM | ERR1203055              | Ghana |
| G08498 | TBNM2319  | SNOG210 | NMIMR | WTSI | DYM | ERR1215474              | Ghana |
| G08499 | TBNM2541  | SNOG230 | NMIMR | WTSI | DYM | ERR1203056              | Ghana |
| G08500 | TBNM3030  | SNOG231 | NMIMR | WTSI | DYM | ERR1203057              | Ghana |
| G08501 | TBNM2423  | SNOG232 | NMIMR | WTSI | DYM | ERR1203058              | Ghana |
| G08502 | TBNM2266  | SNOG233 | NMIMR | WTSI | DYM | ERR1203059              | Ghana |
| G08503 | TBNM2048  | SNOG237 | NMIMR | WTSI | DYM | ERR1203061              | Ghana |
| G08504 | TBNM3530  | SNOG238 | NMIMR | WTSI | DYM | ERR1203062              | Ghana |
| G08507 | TBNM2834  | SNOG243 | NMIMR | WTSI | DYM | ERR1203065              | Ghana |
| G08508 | TBNM2667  | SNOG244 | NMIMR | WTSI | DYM | ERR1203066              | Ghana |
| G08510 | TBNM2710  | SNOG246 | NMIMR | WTSI | DYM | ERR1203068              | Ghana |
| G08511 | TBNM2608  | SNOG247 | NMIMR | WTSI | DYM | ERR1203069              | Ghana |
| G08512 | TBNM2519  | SNOG248 | NMIMR | WTSI | DYM | ERR1203070              | Ghana |
| G08514 | TBNM2878  | SNOG250 | NMIMR | WTSI | DYM | ERR1203072              | Ghana |
| G08516 | TBNM2890  | SNOG252 | NMIMR | WTSI | DYM | ERR1203074              | Ghana |
| G08518 | TBNM2698  | SNOG254 | NMIMR | WTSI | DYM | ERR1203076              | Ghana |
| G08519 | TBNM2874  | SNOG255 | NMIMR | WTSI | DYM | ERR1203077              | Ghana |
| G08611 | TBNM0039  | SNOG003 | NMIMR | WTSI | DYM | ERR502471               | Ghana |
| G08612 | TBNM0074  | SNOG007 | NMIMR | WTSI | DYM | ERR502475               | Ghana |
| G08613 | TBNM0076  | SNOG008 | NMIMR | WTSI | DYM | ERR502476               | Ghana |
| G08614 | TBNM0123  | SNOG009 | NMIMR | WTSI | DYM | ERR502477;<br>ERR702399 | Ghana |
| G08615 | TBNM0443  | SNOG014 | NMIMR | WTSI | DYM | ERR502480               | Ghana |
| G08616 | TBNM0559  | SNOG021 | NMIMR | WTSI | DYM | ERR502487               | Ghana |
| G08618 | TBNM0596  | SNOG025 | NMIMR | WTSI | DYM | ERR502491;<br>ERR702401 | Ghana |
| G08619 | TBNM0637  | SNOG028 | NMIMR | WTSI | DYM | ERR502494;<br>ERR702402 | Ghana |
| G08622 | TBNM0712  | SNOG034 | NMIMR | WTSI | DYM | ERR502500               | Ghana |
| G08623 | TBNM0730  | SNOG035 | NMIMR | WTSI | DYM | ERR502501               | Ghana |
| G08624 | TBNM0736  | SNOG036 | NMIMR | WTSI | DYM | ERR502502               | Ghana |
| G08625 | TBNM0738  | SNOG037 | NMIMR | WTSI | DYM | ERR502503;<br>ERR702403 | Ghana |
| G08627 | TBNM0750  | SNOG039 | NMIMR | WTSI | DYM | ERR502505               | Ghana |

|        |           |         |       |      |     |                         |       |
|--------|-----------|---------|-------|------|-----|-------------------------|-------|
| G08628 | TBNM0758  | SNOG040 | NMIMR | WTSI | DYM | ERR502506               | Ghana |
| G08629 | TBNM0767  | SNOG041 | NMIMR | WTSI | DYM | ERR502507;<br>ERR702404 | Ghana |
| G08630 | TBNM0789  | SNOG042 | NMIMR | WTSI | DYM | ERR502508               | Ghana |
| G08631 | TBNM0791  | SNOG043 | NMIMR | WTSI | DYM | ERR502509               | Ghana |
| G08632 | TBNM1071  | SNOG046 | NMIMR | WTSI | DYM | ERR502512               | Ghana |
| G08633 | TBNM1079  | SNOG047 | NMIMR | WTSI | DYM | ERR502513               | Ghana |
| G08634 | TBNM1102  | SNOG048 | NMIMR | WTSI | DYM | ERR502514               | Ghana |
| G08635 | TBNM1115  | SNOG049 | NMIMR | WTSI | DYM | ERR502515               | Ghana |
| G08636 | TBNM1123  | SNOG050 | NMIMR | WTSI | DYM | ERR502516               | Ghana |
| G08637 | TBNM1144  | SNOG051 | NMIMR | WTSI | DYM | ERR502517               | Ghana |
| G08641 | TBNM1192  | SNOG056 | NMIMR | WTSI | DYM | ERR502521               | Ghana |
| G08642 | TBNM1200  | SNOG057 | NMIMR | WTSI | DYM | ERR502522               | Ghana |
| G08643 | TBNM1219  | SNOG058 | NMIMR | WTSI | DYM | ERR502523               | Ghana |
| G08644 | TBNM1257  | SNOG060 | NMIMR | WTSI | DYM | ERR502525               | Ghana |
| G08646 | TBNM1283a | SNOG062 | NMIMR | WTSI | DYM | ERR502527               | Ghana |
| G08647 | TBNM1289  | SNOG063 | NMIMR | WTSI | DYM | ERR502528               | Ghana |
| G08649 | TBNM1316  | SNOG065 | NMIMR | WTSI | DYM | ERR502530               | Ghana |
| G08650 | TBNM1434  | SNOG068 | NMIMR | WTSI | DYM | ERR502533               | Ghana |
| G08651 | TBNM1697  | SNOG069 | NMIMR | WTSI | DYM | ERR502534               | Ghana |
| G08652 | TBNM1916  | SNOG073 | NMIMR | WTSI | DYM | ERR502536               | Ghana |
| G08653 | TBNM1918  | SNOG074 | NMIMR | WTSI | DYM | ERR502537               | Ghana |
| G08655 | TBNM0010  | SNOG001 | NMIMR | WTSI | DYM | ERR517471               | Ghana |
| G08656 | TBNM1950  | SNOG206 | NMIMR | WTSI | DYM | ERR1215473              | Ghana |
| G08657 | TBNM2988  | SNOG200 | NMIMR | WTSI | DYM | ERR1215472              | Ghana |
| G08658 | TBNM2151  | SNOG199 | NMIMR | WTSI | DYM | ERR1215471              | Ghana |
| G08659 | TBNM2319  | SNOG198 | NMIMR | WTSI | DYM | ERR1215470              | Ghana |
| G08660 | TBNM1343  | SNOG076 | NMIMR | WTSI | DYM | ERR702407               | Ghana |
| G08661 | TBNM1803  | SNOG077 | NMIMR | WTSI | DYM | ERR702408               | Ghana |
| G08662 | TBNM1818  | SNOG078 | NMIMR | WTSI | DYM | ERR702409               | Ghana |
| G08663 | TBNM1615  | SNOG079 | NMIMR | WTSI | DYM | ERR702410               | Ghana |
| G08664 | TBNM1291  | SNOG080 | NMIMR | WTSI | DYM | ERR702411               | Ghana |
| G08665 | TBNM1186  | SNOG081 | NMIMR | WTSI | DYM | ERR702412               | Ghana |
| G08666 | TBNM1309  | SNOG082 | NMIMR | WTSI | DYM | ERR702413               | Ghana |
| G08667 | TBNM1966  | SNOG083 | NMIMR | WTSI | DYM | ERR702414               | Ghana |
| G08668 | TBNM1733  | SNOG084 | NMIMR | WTSI | DYM | ERR702415               | Ghana |
| G08669 | TBNM1404  | SNOG085 | NMIMR | WTSI | DYM | ERR702416               | Ghana |
| G08670 | TBNM1726  | SNOG086 | NMIMR | WTSI | DYM | ERR702417               | Ghana |
| G08671 | TBNM1313  | SNOG087 | NMIMR | WTSI | DYM | ERR702418               | Ghana |
| G08672 | TBNM1452  | SNOG088 | NMIMR | WTSI | DYM | ERR702419               | Ghana |
| G08673 | TBNM1391  | SNOG089 | NMIMR | WTSI | DYM | ERR702420               | Ghana |
| G08674 | TBNM1158  | SNOG090 | NMIMR | WTSI | DYM | ERR702421               | Ghana |
| G08675 | TBNM1723  | SNOG091 | NMIMR | WTSI | DYM | ERR702422               | Ghana |
| G08676 | TBNM1741  | SNOG092 | NMIMR | WTSI | DYM | ERR702423               | Ghana |
| G08677 | TBNM1465  | SNOG093 | NMIMR | WTSI | DYM | ERR702424               | Ghana |
| G08678 | TBNM1082  | SNOG094 | NMIMR | WTSI | DYM | ERR702425               | Ghana |



|        |           |         |       |      |     |           |       |
|--------|-----------|---------|-------|------|-----|-----------|-------|
| G08679 | TBNM1297A | SNOG095 | NMIMR | WTSI | DYM | ERR702426 | Ghana |
| G08680 | TBNM1861A | SNOG096 | NMIMR | WTSI | DYM | ERR702427 | Ghana |
| G08681 | TBNM0205  | SNOG098 | NMIMR | WTSI | DYM | ERR702428 | Ghana |
| G08682 | TBNM0006  | SNOG100 | NMIMR | WTSI | DYM | ERR702430 | Ghana |
| G08683 | TBNM1050  | SNOG101 | NMIMR | WTSI | DYM | ERR702431 | Ghana |
| G08684 | TBNM0132  | SNOG102 | NMIMR | WTSI | DYM | ERR702432 | Ghana |
| G08686 | TBNM1045  | SNOG104 | NMIMR | WTSI | DYM | ERR702434 | Ghana |
| G08687 | TBNM1841  | SNOG105 | NMIMR | WTSI | DYM | ERR702435 | Ghana |
| G08688 | TBNM1779  | SNOG106 | NMIMR | WTSI | DYM | ERR702436 | Ghana |
| G08690 | TBNM2080  | SNOG109 | NMIMR | WTSI | DYM | ERR751290 | Ghana |
| G08691 | TBNM1726B | SNOG110 | NMIMR | WTSI | DYM | ERR751291 | Ghana |
| G08692 | TBNM2240  | SNOG111 | NMIMR | WTSI | DYM | ERR751292 | Ghana |
| G08693 | TBNM1879  | SNOG112 | NMIMR | WTSI | DYM | ERR751293 | Ghana |
| G08694 | TBNM2016  | SNOG113 | NMIMR | WTSI | DYM | ERR751294 | Ghana |
| G08695 | TBNM2090  | SNOG114 | NMIMR | WTSI | DYM | ERR751295 | Ghana |
| G08696 | TBNM1186B | SNOG115 | NMIMR | WTSI | DYM | ERR751296 | Ghana |
| G08697 | TBNM1957  | SNOG116 | NMIMR | WTSI | DYM | ERR751297 | Ghana |
| G08698 | TBNM1313B | SNOG117 | NMIMR | WTSI | DYM | ERR751298 | Ghana |
| G08699 | TBNM1723B | SNOG118 | NMIMR | WTSI | DYM | ERR751299 | Ghana |
| G08700 | TBNM1421  | SNOG119 | NMIMR | WTSI | DYM | ERR751300 | Ghana |
| G08701 | TBNM1763  | SNOG120 | NMIMR | WTSI | DYM | ERR751301 | Ghana |
| G08702 | TBNM1391B | SNOG121 | NMIMR | WTSI | DYM | ERR751302 | Ghana |
| G08703 | TBNM1779B | SNOG122 | NMIMR | WTSI | DYM | ERR751303 | Ghana |
| G08704 | TBNM1814  | SNOG123 | NMIMR | WTSI | DYM | ERR751304 | Ghana |
| G08705 | TBNM1838  | SNOG124 | NMIMR | WTSI | DYM | ERR751305 | Ghana |
| G08706 | TBNM1875  | SNOG125 | NMIMR | WTSI | DYM | ERR751306 | Ghana |
| G08707 | TBNM1802  | SNOG126 | NMIMR | WTSI | DYM | ERR751307 | Ghana |
| G08708 | TBNM2010  | SNOG127 | NMIMR | WTSI | DYM | ERR751308 | Ghana |
| G08709 | TBNM2150  | SNOG128 | NMIMR | WTSI | DYM | ERR751309 | Ghana |
| G08710 | TBNM1818B | SNOG129 | NMIMR | WTSI | DYM | ERR751310 | Ghana |
| G08711 | TBNM2196  | SNOG130 | NMIMR | WTSI | DYM | ERR751311 | Ghana |
| G08712 | TBNM1786  | SNOG131 | NMIMR | WTSI | DYM | ERR751312 | Ghana |
| G08713 | TBNM2163  | SNOG132 | NMIMR | WTSI | DYM | ERR751313 | Ghana |
| G08714 | TBNM1803B | SNOG133 | NMIMR | WTSI | DYM | ERR751314 | Ghana |
| G08715 | TBNM2195  | SNOG134 | NMIMR | WTSI | DYM | ERR751315 | Ghana |
| G08717 | TBNM1044  | SNOG138 | NMIMR | WTSI | DYM | ERR751319 | Ghana |
| G08718 | TBNM1841B | SNOG139 | NMIMR | WTSI | DYM | ERR751320 | Ghana |
| G08719 | TBNM1320  | SNOG140 | NMIMR | WTSI | DYM | ERR751321 | Ghana |
| G08720 | TBNM1984  | SNOG141 | NMIMR | WTSI | DYM | ERR751322 | Ghana |
| G08721 | TBNM1897  | SNOG142 | NMIMR | WTSI | DYM | ERR751323 | Ghana |
| G08722 | TBNM1926  | SNOG143 | NMIMR | WTSI | DYM | ERR751324 | Ghana |
| G08723 | TBNM1165  | SNOG146 | NMIMR | WTSI | DYM | ERR751327 | Ghana |
| G08724 | TBNM1383  | SNOG147 | NMIMR | WTSI | DYM | ERR751328 | Ghana |
| G08725 | TBNM0738B | SNOG148 | NMIMR | WTSI | DYM | ERR751329 | Ghana |
| G08726 | TBNM0132B | SNOG149 | NMIMR | WTSI | DYM | ERR751330 | Ghana |
| G08727 | TBNM1158B | SNOG150 | NMIMR | WTSI | DYM | ERR751331 | Ghana |

|        |           |         |       |      |     |                         |       |
|--------|-----------|---------|-------|------|-----|-------------------------|-------|
| G08728 | TBNM0596C | SNOG151 | NMIMR | WTSI | DYM | ERR751332               | Ghana |
| G08729 | TBNM1010  | SNOG152 | NMIMR | WTSI | DYM | ERR751333               | Ghana |
| G08730 | TBNM1048  | SNOG154 | NMIMR | WTSI | DYM | ERR751334               | Ghana |
| G08731 | TBNM2297  | SNOG155 | NMIMR | WTSI | DYM | ERR751335               | Ghana |
| G08732 | TBNM0123B | SNOG156 | NMIMR | WTSI | DYM | ERR751336               | Ghana |
| G08733 | TBNM1166  | SNOG157 | NMIMR | WTSI | DYM | ERR751337               | Ghana |
| G08734 | TBNM0637B | SNOG158 | NMIMR | WTSI | DYM | ERR751338               | Ghana |
| G08735 | TBNM1311  | SNOG159 | NMIMR | WTSI | DYM | ERR751339               | Ghana |
| G08737 | TBNM1082B | SNOG161 | NMIMR | WTSI | DYM | ERR751341               | Ghana |
| G08738 | TBNM1045B | SNOG162 | NMIMR | WTSI | DYM | ERR751342               | Ghana |
| G08739 | TBNM1012  | SNOG163 | NMIMR | WTSI | DYM | ERR751343               | Ghana |
| G08740 | TBNM1050B | SNOG164 | NMIMR | WTSI | DYM | ERR751344               | Ghana |
| G08741 | TBNM1193  | SNOG165 | NMIMR | WTSI | DYM | ERR751345               | Ghana |
| G08742 | TBNM1030  | SNOG166 | NMIMR | WTSI | DYM | ERR751346               | Ghana |
| G08743 | TBNM2309  | SNOG168 | NMIMR | WTSI | DYM | ERR751348               | Ghana |
| G08744 | TBNM1291B | SNOG169 | NMIMR | WTSI | DYM | ERR751349               | Ghana |
| G08842 | TBNM2035  | SNOG197 | NMIMR | WTSI | DYM | ERR1215469              | Ghana |
| G08843 | TBNM2556  | SNOG196 | NMIMR | WTSI | DYM | ERR1215468              | Ghana |
| G08844 | TBNM2238A | SNOG195 | NMIMR | WTSI | DYM | ERR1215467              | Ghana |
| G08845 | TBNM2341  | SNOG194 | NMIMR | WTSI | DYM | ERR1215466              | Ghana |
| G08846 | TBNM2267  | SNOG189 | NMIMR | WTSI | DYM | ERR1215465              | Ghana |
| G08847 | TBNM2351  | SNOG188 | NMIMR | WTSI | DYM | ERR1215464              | Ghana |
| G08848 | TBNM1011  | SNOG187 | NMIMR | WTSI | DYM | ERR1215463              | Ghana |
| G08849 | TBNM1623  | SNOG186 | NMIMR | WTSI | DYM | ERR1215462              | Ghana |
| G08850 | TBNM1083  | SNOG184 | NMIMR | WTSI | DYM | ERR1215461              | Ghana |
| G08851 | TBNM1533  | SNOG183 | NMIMR | WTSI | DYM | ERR1215460              | Ghana |
| G08852 | TBNM3388  | SNOG178 | NMIMR | WTSI | DYM | ERR1082121              | Ghana |
| G08853 | TBNM2517  | SNOG175 | NMIMR | WTSI | DYM | ERR1082118              | Ghana |
| G08854 | TBNM1343B | SNOG167 | NMIMR | WTSI | DYM | ERR751347               | Ghana |
| G08855 | TBNM1188  | SNOG153 | NMIMR | WTSI | DYM | ERR845916               | Ghana |
| G08856 | TBNM0791B | SNOG145 | NMIMR | WTSI | DYM | ERR751326               | Ghana |
| G08857 | TBNM2007  | SNOG144 | NMIMR | WTSI | DYM | ERR751325               | Ghana |
| G08858 | TBNM1358  | SNOG137 | NMIMR | WTSI | DYM | ERR751318               | Ghana |
| G08859 | TBNM1382  | SNOG136 | NMIMR | WTSI | DYM | ERR751317               | Ghana |
| G08860 | TBNM431B  | SNOG108 | NMIMR | WTSI | DYM | ERR909754               | Ghana |
| G08861 | TBNM0297  | SNOG099 | NMIMR | WTSI | DYM | ERR702429               | Ghana |
| G08862 | TBNM1860A | SNOG097 | NMIMR | WTSI | DYM | ERR909753               | Ghana |
| G08863 | TBNM1416  | SNOG067 | NMIMR | WTSI | DYM | ERR502532;<br>ERR702406 | Ghana |
| G08864 | TBNM1325  | SNOG066 | NMIMR | WTSI | DYM | ERR502531               | Ghana |
| G08865 | TBNM1244  | SNOG059 | NMIMR | WTSI | DYM | ERR502524               | Ghana |
| G08866 | TBNM0802b | SNOG045 | NMIMR | WTSI | DYM | ERR502511               | Ghana |
| G08867 | TBNM0802  | SNOG044 | NMIMR | WTSI | DYM | ERR502510;<br>ERR702405 | Ghana |
| G08868 | TBNM0703  | SNOG032 | NMIMR | WTSI | DYM | ERR502498               | Ghana |
| G08869 | TBNM0701  | SNOG031 | NMIMR | WTSI | DYM | ERR502497               | Ghana |
| G08870 | TBNM0693  | SNOG030 | NMIMR | WTSI | DYM | ERR502496               | Ghana |

|        |           |         |       |      |     |                         |       |
|--------|-----------|---------|-------|------|-----|-------------------------|-------|
| G08871 | TBNM0629  | SNOG027 | NMIMR | WTSI | DYM | ERR502493               | Ghana |
| G08872 | TBNM0620  | SNOG026 | NMIMR | WTSI | DYM | ERR502492               | Ghana |
| G08873 | TBNM0588  | SNOG024 | NMIMR | WTSI | DYM | ERR502490               | Ghana |
| G08874 | TBNM0585b | SNOG023 | NMIMR | WTSI | DYM | ERR502489               | Ghana |
| G08875 | TBNM0545b | SNOG020 | NMIMR | WTSI | DYM | ERR502486               | Ghana |
| G08876 | TBNM0545  | SNOG019 | NMIMR | WTSI | DYM | ERR502485               | Ghana |
| G08877 | TBNM0530  | SNOG018 | NMIMR | WTSI | DYM | ERR502484               | Ghana |
| G08878 | TBNM0517  | SNOG017 | NMIMR | WTSI | DYM | ERR502483               | Ghana |
| G08879 | TBNM0459  | SNOG016 | NMIMR | WTSI | DYM | ERR502482               | Ghana |
| G08880 | TBNM0451b | SNOG015 | NMIMR | WTSI | DYM | ERR502481               | Ghana |
| G08881 | TBNM0431  | SNOG012 | NMIMR | WTSI | DYM | ERR517472;<br>ERR702400 | Ghana |
| G08882 | TBNM0408  | SNOG011 | NMIMR | WTSI | DYM | ERR502479               | Ghana |
| G08883 | TBNM0320  | SNOG010 | NMIMR | WTSI | DYM | ERR502478               | Ghana |
| G08884 | TBNM0070  | SNOG006 | NMIMR | WTSI | DYM | ERR502474               | Ghana |
| G08885 | TBNM0067  | SNOG005 | NMIMR | WTSI | DYM | ERR502473               | Ghana |
| G08886 | TBNM0064  | SNOG004 | NMIMR | WTSI | DYM | ERR502472               | Ghana |
| G08887 | TBNM0011  | SNOG002 | NMIMR | WTSI | DYM | ERR502470               | Ghana |
| G11441 | TBNM3293  | SNOG225 | NMIMR | WTSI | DYM | ERR1203052              | Ghana |
| G11553 | 10448-01  | lib3294 | RCB   | RCB  | SN  | Pending                 | Ghana |
| G11554 | TBNM2859  | SNOG235 | NMIMR | WTSI | DYM | ERR1203060              | Ghana |
| G11555 | 10449-01  | lib3295 | RCB   | RCB  | SN  | ERR1203074              | Ghana |
| G11556 | 10451-01  | lib3296 | RCB   | RCB  | SN  | Pending                 | Ghana |
| G11557 | 2569-02   | lib3329 | RCB   | RCB  | SN  | Pending                 | Ghana |
| G11558 | 2574-02   | lib3330 | RCB   | RCB  | SN  | Pending                 | Ghana |
| G11559 | 2586-02   | lib3331 | RCB   | RCB  | SN  | Pending                 | Ghana |
| G11560 | 2598-02   | lib3332 | RCB   | RCB  | SN  | Pending                 | Ghana |
| G11561 | 2607-02   | lib3333 | RCB   | RCB  | SN  | Pending                 | Ghana |
| G11565 | 3377-03   | lib3388 | RCB   | RCB  | SN  | Pending                 | Ghana |
| G11566 | 3482-03   | lib3334 | RCB   | RCB  | SN  | Pending                 | Ghana |
| G11577 | 4802-03   | lib3338 | RCB   | RCB  | SN  | Pending                 | Ghana |
| G11578 | 4804-03   | lib3339 | RCB   | RCB  | SN  | Pending                 | Ghana |
| G11580 | 5348-02   | lib3340 | RCB   | RCB  | SN  | Pending                 | Ghana |
| G11582 | 5355-02   | lib3341 | RCB   | RCB  | SN  | Pending                 | Ghana |
| G11583 | 5358-02   | lib3342 | RCB   | RCB  | SN  | Pending                 | Ghana |
| G11584 | 5360-02   | lib3343 | RCB   | RCB  | SN  | Pending                 | Ghana |
| G11585 | 5361-02   | lib3344 | RCB   | RCB  | SN  | Pending                 | Ghana |
| G11586 | 5362-02   | lib3345 | RCB   | RCB  | SN  | Pending                 | Ghana |
| G11587 | 5372-02   | lib3346 | RCB   | RCB  | SN  | Pending                 | Ghana |
| G11588 | 5374-02   | lib3347 | RCB   | RCB  | SN  | Pending                 | Ghana |
| G11589 | 5375-02   | lib3348 | RCB   | RCB  | SN  | Pending                 | Ghana |
| G11590 | 5376-02   | lib3349 | RCB   | RCB  | SN  | Pending                 | Ghana |
| G11591 | 5378-02   | lib3350 | RCB   | RCB  | SN  | Pending                 | Ghana |
| G11592 | 5382-02   | lib3351 | RCB   | RCB  | SN  | Pending                 | Ghana |
| G11593 | 5383-02   | lib3352 | RCB   | RCB  | SN  | Pending                 | Ghana |
| G11594 | 5389-02   | lib3353 | RCB   | RCB  | SN  | Pending                 | Ghana |

|        |          |         |     |     |    |           |       |
|--------|----------|---------|-----|-----|----|-----------|-------|
| G11595 | 5398-02  | lib3354 | RCB | RCB | SN | Pending   | Ghana |
| G11596 | 5403-02  | lib3355 | RCB | RCB | SN | Pending   | Ghana |
| G11597 | 5404-02  | lib3356 | RCB | RCB | SN | Pending   | Ghana |
| G11598 | 5405-02  | lib3357 | RCB | RCB | SN | Pending   | Ghana |
| G11599 | 5415-02  | lib3358 | RCB | RCB | SN | Pending   | Ghana |
| G11600 | 5417-02  | lib3359 | RCB | RCB | SN | Pending   | Ghana |
| G11601 | 5418-02  | lib3360 | RCB | RCB | SN | Pending   | Ghana |
| G11602 | 5419-02  | lib3361 | RCB | RCB | SN | Pending   | Ghana |
| G11603 | 5421-02  | lib3362 | RCB | RCB | SN | Pending   | Ghana |
| G11604 | 5432-02  | lib3363 | RCB | RCB | SN | Pending   | Ghana |
| G11605 | 5434-02  | lib1185 | RCB | RCB | SN | ERR552588 | Ghana |
| G11606 | 5436-02  | lib3364 | RCB | RCB | SN | Pending   | Ghana |
| G11607 | 5438-02  | lib3365 | RCB | RCB | SN | Pending   | Ghana |
| G11608 | 5441-04  | lib3389 | RCB | RCB | SN | Pending   | Ghana |
| G11609 | 5444-02  | lib3366 | RCB | RCB | SN | Pending   | Ghana |
| G11610 | 5446-02  | lib3367 | RCB | RCB | SN | Pending   | Ghana |
| G11611 | 5447-02  | lib3368 | RCB | RCB | SN | Pending   | Ghana |
| G11612 | 5450-02  | lib3369 | RCB | RCB | SN | Pending   | Ghana |
| G11613 | 5451-02  | lib3370 | RCB | RCB | SN | Pending   | Ghana |
| G11614 | 5456-02  | lib3371 | RCB | RCB | SN | Pending   | Ghana |
| G11615 | 5467-02  | lib3372 | RCB | RCB | SN | Pending   | Ghana |
| G11616 | 5468-02  | lib1191 | RCB | RCB | SN | ERR552963 | Ghana |
| G11618 | 5471-02  | lib3374 | RCB | RCB | SN | Pending   | Ghana |
| G11619 | 5473-02  | lib3375 | RCB | RCB | SN | Pending   | Ghana |
| G11620 | 5475-02  | lib3376 | RCB | RCB | SN | Pending   | Ghana |
| G11621 | 5495-02  | lib3377 | RCB | RCB | SN | Pending   | Ghana |
| G11623 | 6361-03  | lib3283 | RCB | RCB | SN | Pending   | Ghana |
| G11626 | 8270-03  | lib3285 | RCB | RCB | SN | Pending   | Ghana |
| G11627 | 8303-02  | lib3380 | RCB | RCB | SN | Pending   | Ghana |
| G11637 | 9858-03  | lib3286 | RCB | RCB | SN | Pending   | Ghana |
| G11640 | 10452-01 | lib3297 | RCB | RCB | SN | Pending   | Ghana |
| G11641 | 10455-01 | lib3298 | RCB | RCB | SN | Pending   | Ghana |
| G11642 | 10456-01 | lib3299 | RCB | RCB | SN | Pending   | Ghana |
| G11643 | 10463-02 | lib3384 | RCB | RCB | SN | Pending   | Ghana |
| G11644 | 10473-01 | lib1186 | RCB | RCB | SN | ERR552172 | Ghana |
| G11645 | 10476-01 | lib3300 | RCB | RCB | SN | Pending   | Ghana |
| G11646 | 10480-01 | lib3301 | RCB | RCB | SN | Pending   | Ghana |
| G11647 | 10482-01 | lib3385 | RCB | RCB | SN | Pending   | Ghana |
| G11648 | 10485-01 | lib3302 | RCB | RCB | SN | Pending   | Ghana |
| G11649 | 10494-01 | lib1187 | RCB | RCB | SN | ERR552187 | Ghana |
| G11650 | 10512-01 | lib3304 | RCB | RCB | SN | Pending   | Ghana |
| G11651 | 10514-01 | lib1189 | RCB | RCB | SN | ERR552021 | Ghana |
| G11652 | 10516-01 | lib3305 | RCB | RCB | SN | Pending   | Ghana |
| G11653 | 10517-01 | lib1190 | RCB | RCB | SN | ERR552328 | Ghana |
| G11654 | 10519-01 | lib3306 | RCB | RCB | SN | Pending   | Ghana |
| G11661 | 12184-03 | lib3386 | RCB | RCB | SN | Pending   | Ghana |

|        |          |         |     |     |    |           |       |
|--------|----------|---------|-----|-----|----|-----------|-------|
| G11662 | 12322-03 | lib3387 | RCB | RCB | SN | Pending   | Ghana |
| G11665 | 1407-02  | lib3311 | RCB | RCB | SN | Pending   | Ghana |
| G11666 | 1410-02  | lib3312 | RCB | RCB | SN | Pending   | Ghana |
| G11667 | 1413-02  | lib3313 | RCB | RCB | SN | Pending   | Ghana |
| G11668 | 1426-02  | lib3314 | RCB | RCB | SN | Pending   | Ghana |
| G11669 | 1431-02  | lib3315 | RCB | RCB | SN | Pending   | Ghana |
| G11670 | 1432-02  | lib3316 | RCB | RCB | SN | Pending   | Ghana |
| G11671 | 1437-02  | lib3317 | RCB | RCB | SN | Pending   | Ghana |
| G11672 | 1440-02  | lib3318 | RCB | RCB | SN | Pending   | Ghana |
| G11673 | 1443-02  | lib1188 | RCB | RCB | SN | ERR551617 | Ghana |
| G11674 | 1447-02  | lib3319 | RCB | RCB | SN | Pending   | Ghana |
| G11675 | 1449-02  | lib3035 | RCB | RCB | SN | ERR868539 | Ghana |
| G11676 | 1452-02  | lib3320 | RCB | RCB | SN | Pending   | Ghana |
| G11677 | 1457-02  | lib3321 | RCB | RCB | SN | Pending   | Ghana |
| G11678 | 1462-02  | lib3322 | RCB | RCB | SN | Pending   | Ghana |
| G11679 | 1465-02  | lib3323 | RCB | RCB | SN | Pending   | Ghana |
| G11680 | 1467-02  | lib3324 | RCB | RCB | SN | Pending   | Ghana |
| G11681 | 1468-02  | lib3325 | RCB | RCB | SN | Pending   | Ghana |
| G11682 | 1472-02  | lib3326 | RCB | RCB | SN | Pending   | Ghana |
| G11683 | 1473-02  | lib1184 | RCB | RCB | SN | ERR552506 | Ghana |
| G11684 | 1474-02  | lib3327 | RCB | RCB | SN | Pending   | Ghana |
| G11693 | 2568-02  | lib3328 | RCB | RCB | SN | Pending   | Ghana |
| G11705 | 8163-02  | lib3378 | RCB | RCB | SN | Pending   | Ghana |
| G11706 | 8214-03  | lib3287 | RCB | RCB | SN | Pending   | Ghana |
| G11707 | 8236-02  | lib3379 | RCB | RCB | SN | Pending   | Ghana |

145

146 KEY:

147 NMIMR: Noguchi Memorial Institute for Medical Research, University of Ghana, Accra, Ghana.

148 WTSI: Wellcome Trust Sanger Institute, Genome Campus, University of Cambridge, United  
149 Kingdom

150 STPH: Swiss Tropical and Public Health Institute, Basel, Switzerland.

151 RCB: Research Center Borstel, Borstel, Germany.

152 ETH: Genomics Facility, Department of Biosystems Science and Engineering, ETH Zurich, Basel,  
153 Switzerland.

154

155

156

157
